# Supplementary material for: Inhibition of Sp1 prevents ER homeostasis and causes cell death by lysosomal membrane permeabilization in pancreatic cancer
Source: PubMed Central journal article supplement (PMC5431512; doi:10.1038/s41598-017-01696-2), 2017-05-08

Inhibition of Sp1 prevents ER homeostasis and causes cell death by lysosomal membrane permeabilization in pancreatic cancer.

Authors: Patricia Dauer<sup>1</sup>, Vineet K. Gupta<sup>2</sup>, Olivia McGinn<sup>1</sup>, Alice Nomura<sup>1,2</sup>, Nikita S. Sharma<sup>2</sup>, Nivedita Arora<sup>1</sup>, Bhuwan Giri<sup>2</sup>, Vikas Dudeja<sup>2</sup>, Ashok K Saluja<sup>1,2</sup>, Sulagna Banerjee\*<sup>2</sup>

### Supplementary Figure Legends

Supplementary Figure 1: **Mithramycin treatment activates the unfolded protein response.**

A) MIA PaCa-2 cells treated with 100 nM mithramycin for 1-6 hours. B) S2-VP10 and S2-013 cells treated with 100 nM mithramycin for 0-24 hours. C) Protein expression of UPR-related genes in MIA PaCa-2 cells treated with 100 nM mithramycin for 0-24 hours. D) RNA splicing of XBP gene in MIA PaCa-2 cells treated with 100 nM mithramycin for 0-24 hours, compared to 18s.

Supplementary Figure 2: **siSp1 results in chronic ER stress.** MIA PaCa-2 cells transfected with siSp1 A) RNA expression of UPR related genes at 24-48 hours. B) Results in RNA splicing of XBP gene compared to 18s.

Supplementary Figure 3: **Tunicamycin does not affect Grp78 promoter binding.** MIA PaCa-2 cells analyzed for ChIP of Sp1 on the Grp78 promoter, after 6 hours of treatment with tunicamycin compared to untreated cells.

Supplementary Figure 4: **Other known ER stress inducers also result in LMP.** MIA PaCa-2 cells analyzed by immunofluorescence of cathepsin B and lysotracker after 6 hours of treatment with A) 100 nM thapsigargin B) 1  $\mu$ M brefeldin A (BFA).

# Supplementary Figure 1:

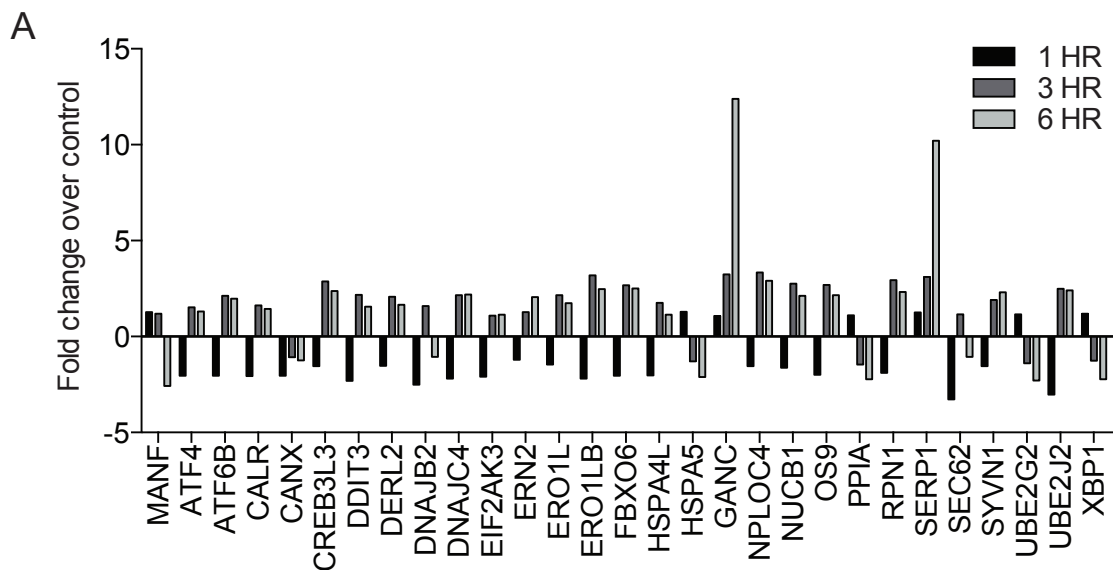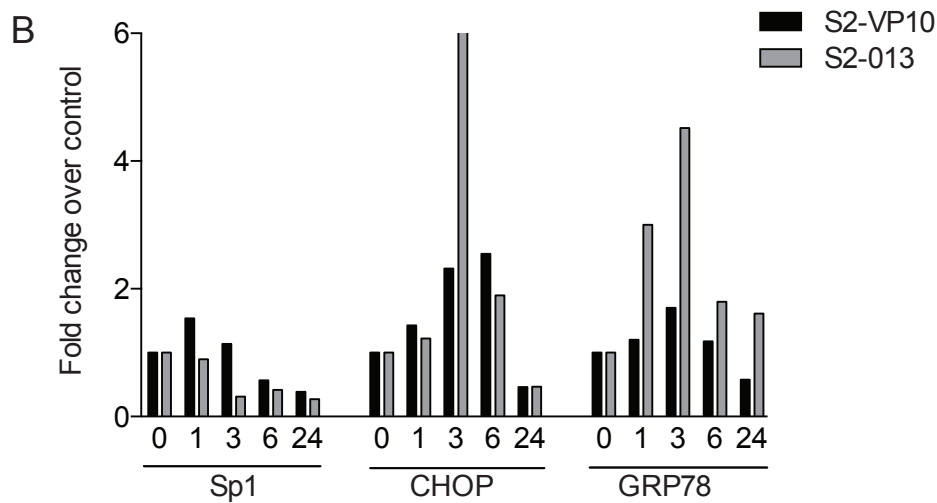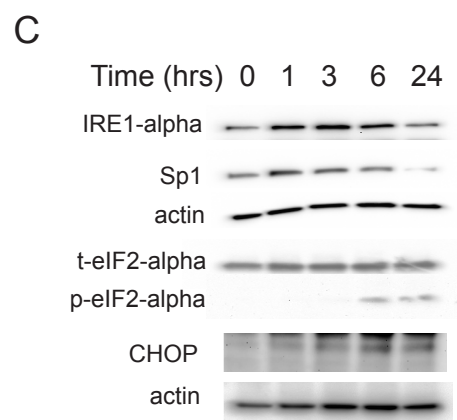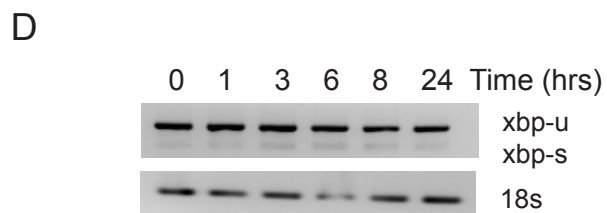

## Supplementary Figure 2:

A

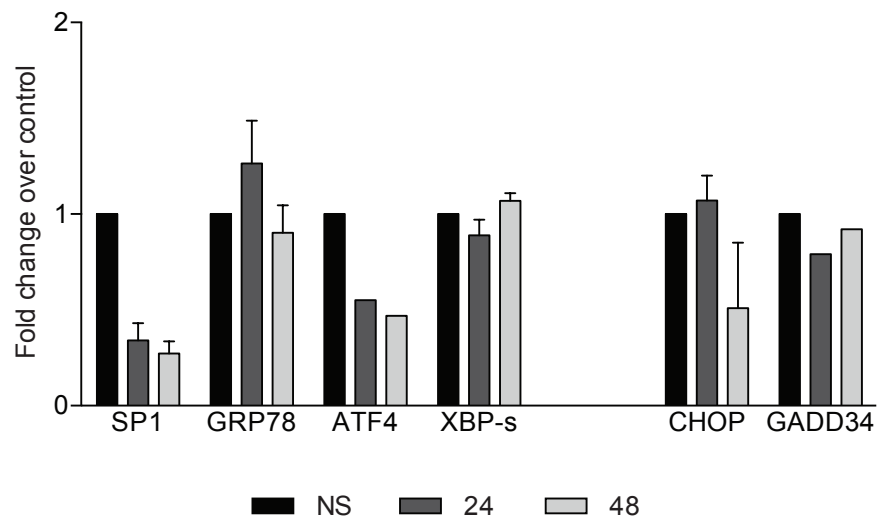

B

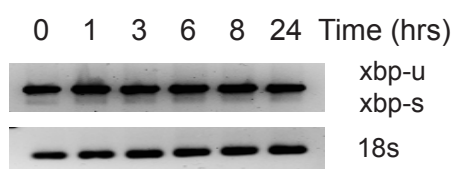

# Supplementary Figure 3:

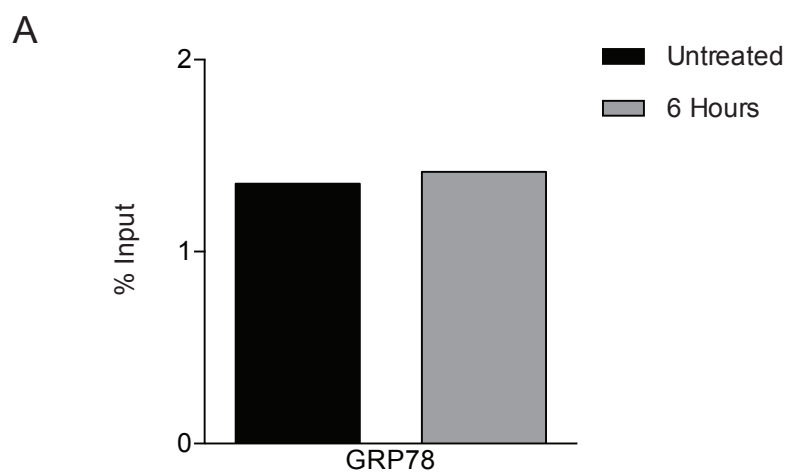

Supplementary Figure 4:

A

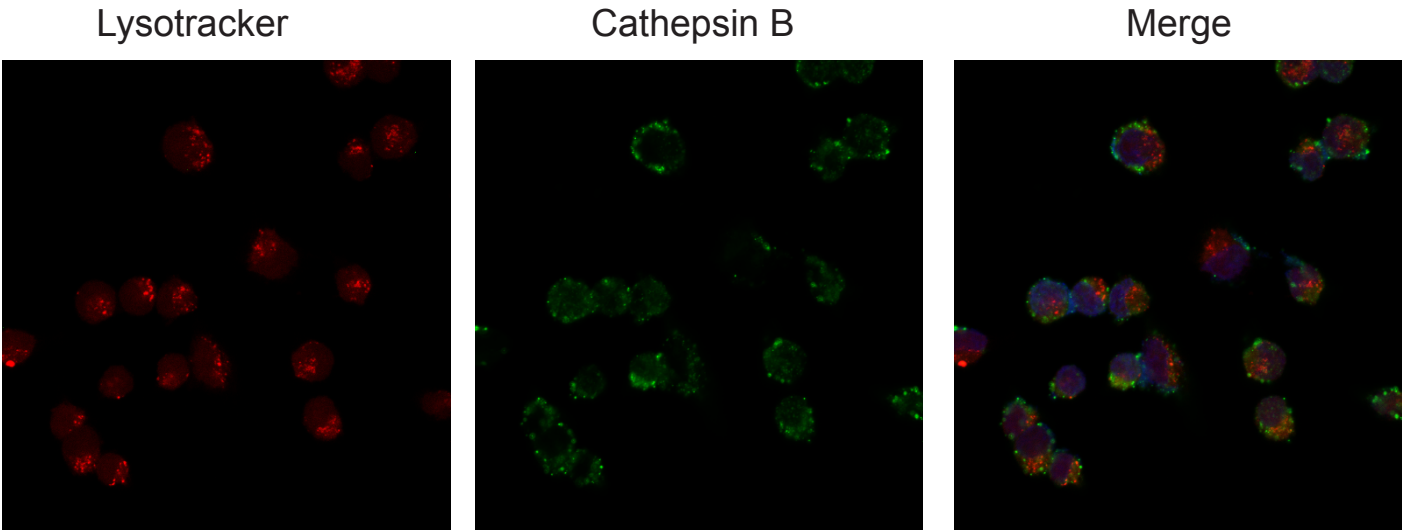

B

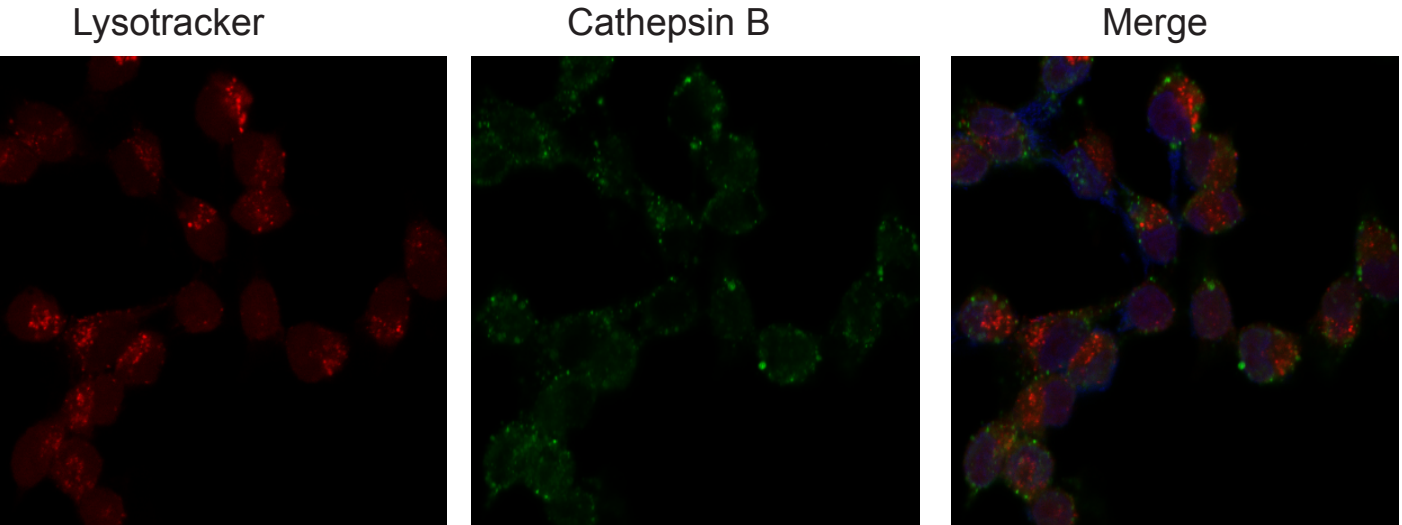

Supplement: 41598_2017_1696_MOESM1_ESM.pdf [file 41598_2017_1696_MOESM1_ESM.pdf]
